# Supplementary material
Source: Springer Nature journal article supplement (https://www.springermedizin.de/resource/supplementary/12889_2013_6066_MOESM1_ESM.pdf/9494356)
Supplement: MOESM1 [file 9494356]

The original data N= 690 555

Major congenital anomalies N= 22 343

N= 668 212

Women under 35 years old N= 544 081

Women over 35 years old N= 124 131

Smokers N=68 983

Non-Smokers N=460 356

Data missing N=14 742

Smokers N=11 277

Non-Smokers N=109 214

Data missing N= 3640
